# Supplementary material
Source: HighWire-hosted journal article supplement (https://bmjopen.bmj.com/content/9/11/e030955)
Supplement: inline-supplementary-material-5 [file inline-supplementary-material-5.pdf]

## Multivariable associations between covariates and non-beneficial treatment, full variable list

| Characteristics                                           | Odds ratios (95% CIs) | P-value |
|-----------------------------------------------------------|-----------------------|---------|
| <b>Hospital</b>                                           |                       |         |
| A (reference category)                                    | 1.0                   |         |
| B*                                                        | 2.66 (1.22 to 5.95)   | 0.015   |
| C*                                                        | 6.64 (3.03 to 15.18)  | < 0.001 |
| <b>Personal characteristics</b>                           |                       |         |
| Age (+ 10 years)*^                                        | 1.46 (1.17 to 1.86)   | 0.001   |
| Male                                                      | 0.85 (0.51 to 1.44)   | 0.553   |
| Non-English speaking background                           | 2.01 (0.84 to 4.55)   | 0.103   |
| Married/de facto                                          | 0.92 (0.54 to 1.57)   | 0.753   |
| Alcohol use                                               | 1.68 (0.78 to 3.5)    | 0.182   |
| Smoker*                                                   | 0.37 (0.13 to 0.94)   | 0.047   |
| Is a carer                                                | 2.67 (0.93 to 7.18)   | 0.058   |
| Aged care resident*                                       | 0.27 (0.1 to 0.72)    | 0.011   |
| <b>Activities of daily living</b>                         |                       |         |
| Independent (reference category)                          | 1.0                   |         |
| Partially dependent                                       | 1.02 (0.5 to 2.08)    | 0.951   |
| Dependent                                                 | 1.87 (0.62 to 5.64)   | 0.264   |
| <b>Exercise tolerance</b>                                 |                       |         |
| No limits (reference category)                            | 1.0                   |         |
| Ordinary activities result in fatigue/symptoms*           | 2.61 (1.04 to 6.94)   | 0.046   |
| Less than ordinary activities result in fatigue/symptoms* | 4.87 (1.72 to 14.71)  | 0.003   |
| Bed bound                                                 | 3.74 (0.79 to 17.78)  | 0.096   |
| Missing                                                   | 0.82 (0.16 to 3.42)   | 0.800   |
| <b>Previous admissions over the past 3 years</b>          |                       |         |
| 0 (reference category)                                    | 1.0                   |         |
| 1                                                         | 1.04 (0.49 to 2.19)   | 0.917   |
| 2                                                         | 0.54 (0.21 to 1.31)   | 0.186   |
| 3 or more                                                 | 0.84 (0.41 to 1.7)    | 0.619   |
| <b>End of life planning</b>                               |                       |         |
| Advance care planning in place                            | 0.26 (0.05 to 1.12)   | 0.084   |
| Advance health directive                                  | 1.3 (0.41 to 3.75)    | 0.643   |
| Enduring power of attorney*                               | 7.73 (1.91 to 38.1)   | 0.007   |
| Palliative care review                                    | 0.76 (0.11 to 4.22)   | 0.765   |
| Acute resuscitation plan                                  | 0.55 (0.08 to 3.3)    | 0.527   |
| Not-for-resuscitation order                               | 3.05 (0.41 to 20.82)  | 0.263   |
| <b>Admission characteristics</b>                          |                       |         |
| Interregional transfer*                                   | 2.12 (1.12 to 4.02)   | 0.021   |
| Admitted to ICU*                                          | 5.8 (2.27 to 14.59)   | < 0.001 |
| Death in ICU                                              | 0.4 (0.15 to 1.1)     | 0.075   |
| Conflict in medical team*                                 | 8.44 (2.56 to 29.23)  | < 0.001 |
| Conflict involving family*                                | 10.52 (4.27 to 26.49) | < 0.001 |
| Decision not to treat or to withdraw treatment            | 0.82 (0.38 to 1.89)   | 0.629   |

|                                                                    |                      |       |
|--------------------------------------------------------------------|----------------------|-------|
| <b>Medical speciality</b>                                          |                      |       |
| Other (reference category)                                         | 1.0                  |       |
| Cardiology                                                         | 1.08 (0.31 to 3.18)  | 0.890 |
| Emergency                                                          | 0.30 (0.04 to 1.43)  | 0.180 |
| General Medicine                                                   | 1.23 (0.60 to 2.53)  | 0.570 |
| Neuro                                                              | 0.90 (0.23 to 3.04)  | 0.870 |
| Oncology                                                           | 0.65 (0.16 to 2.15)  | 0.500 |
| Respiratory                                                        | 2.27 (0.70 to 6.77)  | 0.160 |
| <b>SP ICT items<sup>#</sup></b>                                    |                      |       |
| Needs help with personal care                                      | 1.41 (0.64 to 3.08)  | 0.394 |
| Unplanned admissions in past 6 months                              | 0.64 (0.32 to 1.31)  | 0.221 |
| Weight loss                                                        | 1.51 (0.77 to 2.91)  | 0.219 |
| Persistent, troublesome symptoms                                   | 1.24 (0.59 to 2.61)  | 0.576 |
| At risk of dying from a sudden, acute deterioration                | 1.19 (0.62 to 2.10)  | 0.603 |
| Patient requests treatment withdrawal                              | 1.11 (0.24 to 4.36)  | 0.882 |
| Would be surprised if this patient is alive in 12 months           | 1.02 (0.42 to 2.35)  | 0.970 |
| <b>Cause of death category<sup>+,a</sup></b>                       |                      |       |
| Diseases and Disorders of the Kidney And Urinary Tract             | 2.53 (0.27 to 17.66) | 0.370 |
| Diseases and Disorders of the Male Reproductive System             | 1.81 (0.03 to 64.25) | 0.780 |
| Neoplastic disorders (haematological and solid neoplasms)          | 0.98 (0.24 to 3.74)  | 0.970 |
| Infectious and Parasitic DDs (Systemic or unspecified sites)       | 0.52 (0.11 to 2.24)  | 0.400 |
| Alcohol/drug use and alcohol/drug induced organic mental disorders | 0.1 (0.01 to 0.66)   | 0.030 |
| Diseases and Disorders of the Respiratory System                   | 0.63 (0.2 to 1.97)   | 0.420 |
| Diseases and Disorders of the Circulatory System                   | 0.83 (0.28 to 2.46)  | 0.730 |
| Diseases and Disorders of the Digestive System                     | 1.91 (0.34 to 9.57)  | 0.440 |
| Diseases and Disorders of the Hepatobiliary System And Pancreas    | 0.03 (0 to 0.66)     | 0.030 |
| 2 categories                                                       | 0.78 (0.3 to 2.05)   | 0.600 |
| 3 or more categories                                               | 0.73 (0.21 to 2.46)  | 0.620 |

ICU=intensive care unit

\*: p&lt;0.05

^: Age was modelled in ten year increments by dividing the age covariate by 10

#: Full SP ICT item descriptions are in Supplementary File 1

+: Cause of death was coded according to the Major Diagnostic Categories (MDCs) as defined in the World Health Organisation International Classification of Diseases<sup>27</sup>

a: Categories with zero observations are not reported, these include: DDs of the eye; ear, nose, mouth and throat; musculoskeletal system and connective tissue; skin, subcutaneous tissue and breast; and mental DDs.
